# Supplementary material
Source: publisher figshare collection journal article supplement (https://sage.figshare.com/ndownloader/files/21301101)
Supplement: Supplementary file 1 [file 21301101]

**Figure S1. IVT Survey**

**Practice patterns of retina specialists administering intravitreal anti-VEGF injections**

General questions

1- Where is your practice located?

1. North America
2. South America
3. Europe
4. Africa/Middle East
5. Japan/Pacific/Asia

2- What is your practice setting?

1. Academic center/Hospital/Government
2. Solo or group private practice
3. Hybrid academic and private practice

3- When do you give anti-VEGF injections?

1. During regular clinic days
2. Injection only day
3. Both
4. Neither

4- How many anti-VEGF intravitreal injections do you perform in a typical day?

1. <10
2. 10-19
3. 20-29
4. 30-39
5. 40 or more

5- Do you perform bilateral injections?

1. Yes
2. No

6- Where do you primarily perform your injections?

1. Exam room
2. Treatment room
3. Operating room

7- Do you use an assistant or technician to assist you in injection preparation?

1. Yes
2. No

8- How long do you think patients, on average, spend in your clinic from check-in to check-out for an injection only visit?

1. < 30 min
2. 30-60 min
3. 60-90 min
4. > 90 min

9- On average, what percentage of your patients receive anti-VEGF injections?

1. < 25%
2. 25-50%
3. 50-75%
4. > 75%

Procedure technique

10- What do you wear for injections? Select all that apply.

1. Mask
2. Sterile gloves
3. Non-sterile gloves
4. I don’t wear a mask or gloves.

11- What technique do you employ as your primary anesthetic prior to injection? Select one.

1. Proparacaine or similar anesthetic drop only
2. Lidocaine gel
3. Lidocaine soaked pledgets
4. Subconjunctival lidocaine

12- Do you have patients that request a different form of anesthesia (or additional applications) due to injection pain or post-injection pain?

1. Yes, frequently
2. Yes, sometimes
3. Yes, infrequently to rarely
4. No, never

13- What is your primary reason for selecting your preferred method of ocular anesthesia? Select all that apply.

1. Patient experience
2. Office efficiency
3. Cost

14- How long do you wait for the anesthesia to take effect (time that elapses from the first application of anesthesia until injection is given)?

1. < 2 minutes
2. 2-5 minutes
3. 5-10 minutes
4. >10 minutes

15- Do you (or your technician) prepare the patient’s eyelids using any of the following? Select all that apply.

a. Betadine eyelid preparation

b. Non-alcohol based eyelid preparation

c. Pre-procedure lid scrubs

d. Pre-procedure topical antibiotic drops

e. Other:____________

16- How do you apply betadine to the conjunctiva before injection? Select all that apply.

1. Drop at the beginning of prep
2. Local application at the injection site
3. Before and after anesthetic use prior to injection
4. I do not use betadine

17- How long do you wait after the last application of betadine prior to injection?

1. 10 seconds or less
2. 15 seconds
3. 20 seconds
4. 30 seconds
5. > 30 seconds
6. I do not use betadine.

18- Do you use a sterile drape?

1. Yes, always
2. Yes, usually
3. No, never

19- Do you use an eyelid speculum?

1. Yes
2. No

20- Do you use a caliper to mark the injection location prior to administration?

1. Yes
2. No

21- Do you use an injection guide?

1. Yes
2. No

22- What gauge needle do you primarily use for injections?

1. 30 gauge
2. 32 gauge
3. Other:__________

23- In which location do you typically inject?

1. Superotemporal
2. Inferotemporal
3. Other:___________

24- Do you dilate injection-only patients?

a. Yes

b. No

Post-procedure

25- Do patients receive post-injection lubrication drops during the visit or lubrication instructions for post-visit application?

1. Yes, both a lubricant drop during visit and instructions for post-visit application
2. Yes, only a lubricant drop during the visit
3. Yes, only instructions for post-visit application of a lubricant
4. Neither

26- Do you have patients administer antibiotic drops after injection?

1. Yes
2. No

27-Does your office receive calls from patients in the 24-48 hour post injection period due to pain or foreign-body sensation?

1. Frequently
2. Sometimes
3. Rarely
4. Never

28- What percentage of your patients would you estimate have at least mild post-injection discomfort during the first 24 hours post-injection?

1. <25%
2. 25-50%
3. 50-75%
4. >75%
5. I don't know

29- What do you think is the primary cause of non-infectious post-injection pain?

1. Corneal toxicity
2. Needle track inflammation
3. Elevated IOP
4. Underlying ocular surface disease

30- What do you think contributes to post-injection corneal toxicity? Select all that apply.

1. Duration of the procedure / amount of time eyelids are held open
2. Betadine application
3. Lidocaine application
4. Underlying ocular surface disease
5. Other:____________

31- Have you or your assistant experienced a needle-stick injury during an intravitreal injection visit? Select all that apply.

1. Yes, physician
2. Yes, assistant
3. No
